# Supplementary figures and images for: Spectral interferences of oxygen and water molecules in hydride generation atomic absorption spectrometry with quartz atomizers: Comparison of preconcentration and on-line atomization modes for As and Se determination
Source: Royal Society of Chemistry journal article supplement (doi:10.1039/c1ja10148j), 2011-01-01

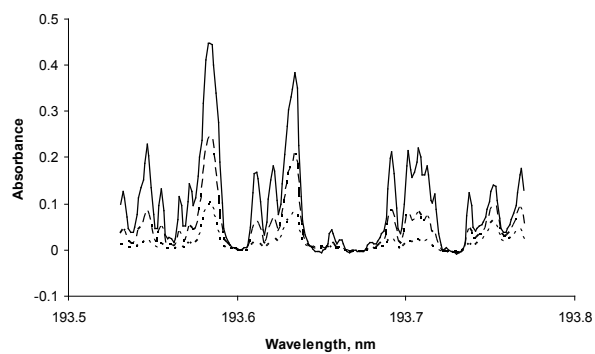

Fig. S1

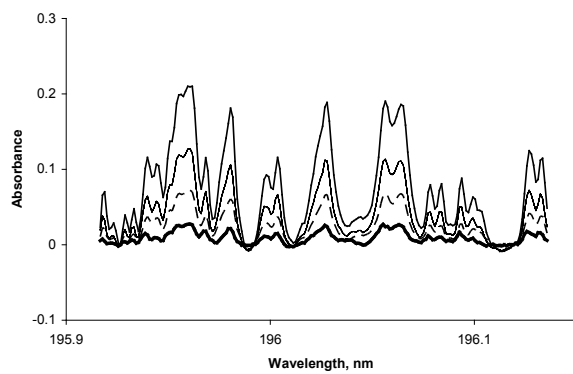

Fig. S2

Supplement: c1ja10148j.pdf [file c1ja10148j.pdf]
